# Supplementary material
Source: PubMed Central journal article supplement (PMC3445701)
Supplement: NIHMS378496-supplement-2_si_002.pdf [file NIHMS378496-supplement-2_si_002.pdf]

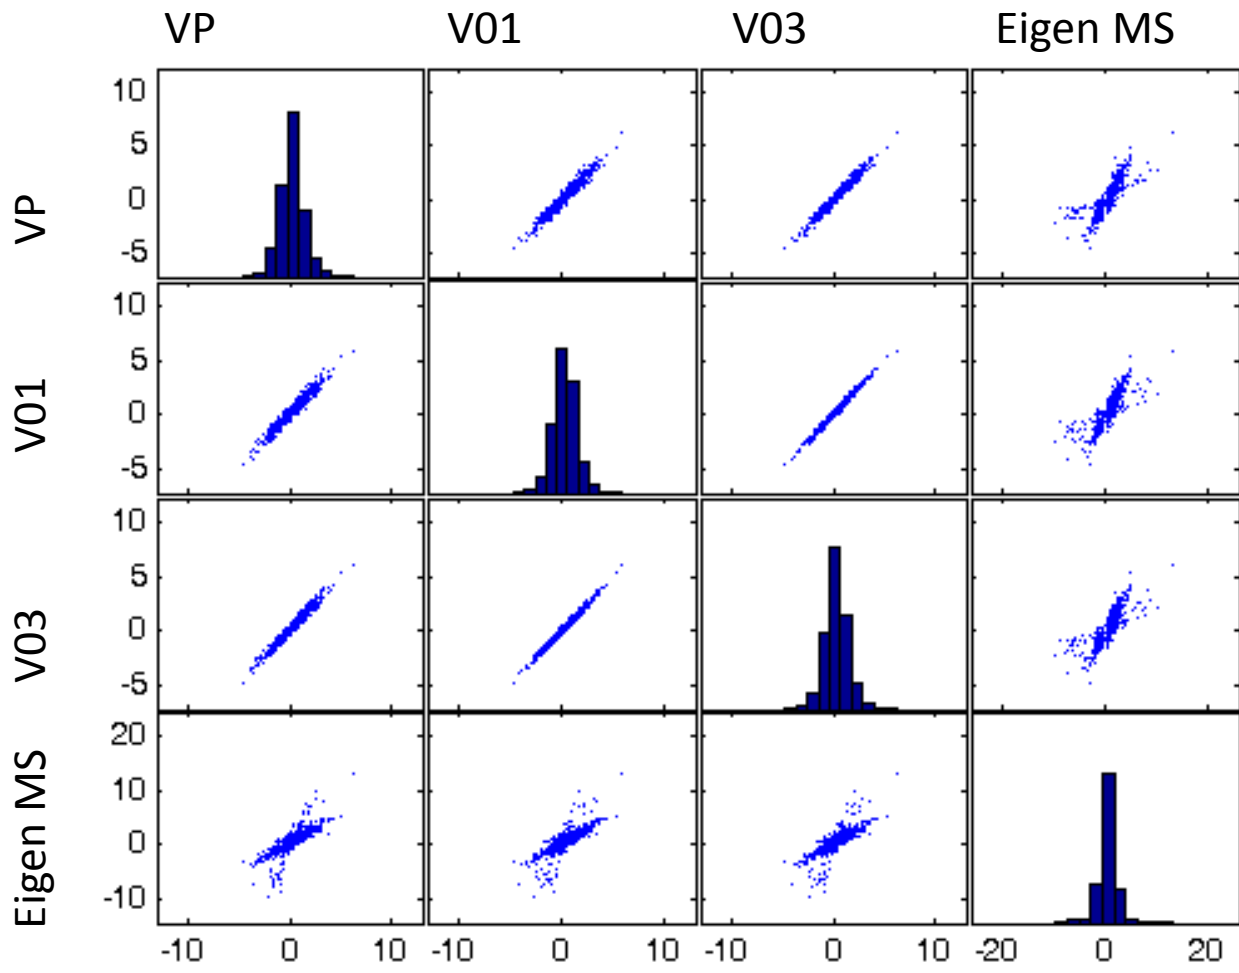

Suppl. Figure 1. Comparison of protein abundances calculated with 4 normalization procedures. Diagonal panels – histograms of normalized relative protein abundances (AD/C) distributions (log scale). Non-diagonal – scatter plots: protein abundance in one normalization procedure versus another normalization procedure. Axis:  $\log_2(\text{AD/C})$
