# Supplementary material
Source: PubMed Central journal article supplement (PMC3445701)
Supplement: NIHMS378496-supplement-3_si_003.pdf [file NIHMS378496-supplement-3_si_003.pdf]

# Network Objects

Click on any object in the network to obtain class info

| Enzymes                                                                             |                       |                                                                                     |                     |
|-------------------------------------------------------------------------------------|-----------------------|-------------------------------------------------------------------------------------|---------------------|
|    | Generic enzyme        |                                                                                     |                     |
| KINASE                                                                              |                       | PHOSPHATASE                                                                         |                     |
|    | Generic kinase        |    | Generic phosphatase |
|    | Protein kinase        |    | Protein phosphatase |
|    | Lipid kinase          |    | Lipid phosphatase   |
| PHOSPHOLIPASE                                                                       |                       |                                                                                     |                     |
|  | Generic phospholipase |                                                                                     |                     |
| PROTEASE                                                                            |                       | GTPase                                                                              |                     |
|  | Generic protease      |  | G-alpha             |
|  | Metalloprotease       |  | RAS - superfamily   |

| Generic classes                                                                       |                                          |
|---------------------------------------------------------------------------------------|------------------------------------------|
|    | Receptor ligand                          |
|    | Transcription factor                     |
|    | Protein                                  |
|    | Cell membrane glycoprotein               |
|    | Compound                                 |
|   | Predicted metabolite or user's structure |
|  | Inorganic ion                            |
|  | Reaction                                 |
|  | DNA                                      |
|  | RNA                                      |
|  | Generic binding protein                  |

| Channels/Transporters                                                             |                           |
|-----------------------------------------------------------------------------------|---------------------------|
|  | Generic channel           |
|  | Ligand-gated ion channel  |
|  | Voltage-gated ion channel |
|  | Transporter               |

| Receptors                                                                         |                                |
|-----------------------------------------------------------------------------------|--------------------------------|
|  | Generic receptor               |
|  | GPCR                           |
|  | Receptors with enzyme activity |

| G protein adaptor/regulators                                                        |                                 |
|-------------------------------------------------------------------------------------|---------------------------------|
|  | G beta/gamma                    |
|  | Regulators (GDI, GAP, GEF etc.) |

| Groups of objects                                                                              |                                                                                                                                                                                                                                                                                               |
|------------------------------------------------------------------------------------------------|-----------------------------------------------------------------------------------------------------------------------------------------------------------------------------------------------------------------------------------------------------------------------------------------------|
|               | <p><b>A complex or a group</b></p> <p>Proteins or compounds physically connected into a complex or related as a group</p>                                                                                                                                                                     |
|             | <p><b>Logical association</b></p> <p>Related proteins or compounds are connected into groups. To see the relations (logical associations) within a group, use «Expand group» function in the scroll-down right-button menu. Use «Collapse logical relations» function to close the group.</p> |
| <br>Group 1 | <p><b>Custom association</b></p> <p>Group of collapsed objects chosen by user</p>                                                                                                                                                                                                             |

| Object highlighting                                                                 |                                                                                                                                                                                                                                 |
|-------------------------------------------------------------------------------------|---------------------------------------------------------------------------------------------------------------------------------------------------------------------------------------------------------------------------------|
| Nodes and root nodes                                                                |                                                                                                                                                                                                                                 |
|    | <p><b>Found object</b><br/>Object selected on the search pane</p>                                                                                                                                                               |
|    | <p><b>Manually selected node(s)</b><br/>Object(s) selected by ctrl + click on it or by click + drag rectangle around it</p>                                                                                                     |
|    | <p><b>Highlight by mouse over</b></p>                                                                                                                                                                                           |
|    | <p><b>Highlight downstream objects</b><br/>When the mouse is over an object (node on a network), the closest interacting nodes are highlighted in CYAN if the direction of interaction is <b>from</b> the initial object</p>    |
|    | <p><b>Highlight upstream objects</b><br/>When the mouse is over an object (node on a network), the closest interacting nodes are highlighted in yellow if the direction of interaction is <b>towards</b> the initial object</p> |
| Root nodes                                                                          |                                                                                                                                                                                                                                 |
|  | <p><b>Root node(s) for network expansion (building)</b><br/>Object(s) from a user-specified uploaded list or from experiments</p>                                                                                               |
|  | <p><b>Initial object(s)</b><br/>Object(s) chosen to build the pathways <b>from</b></p>                                                                                                                                          |
|  | <p><b>Intermediate object(s)</b><br/>Object(s) situated along the pathway</p>                                                                                                                                                   |

|                                                                                   |                                                                         |
|-----------------------------------------------------------------------------------|-------------------------------------------------------------------------|
|   | <b>Terminal object(s)</b><br>Object(s) the pathways terminate <b>on</b> |
| Possible combinations of three above marks (except the first one)                 |                                                                         |
|  |                                                                         |

| Expression data                                                                   |                                                                                                                                                                                                   |
|-----------------------------------------------------------------------------------|---------------------------------------------------------------------------------------------------------------------------------------------------------------------------------------------------|
|  | <b>Overexpressed gene(s)</b><br>Genes with higher conditional expression level compared to the experimental "control"                                                                             |
|  | <b>Underexpressed gene(s)</b><br>Genes with lower conditional expression level compare to the experimental "control"                                                                              |
|  | <b>Mixed-expressed gene(s)</b><br>Genes with conditional expression level statistically different from the experimental "control", with the "sign" of expression varying in different experiments |

## Interactions between objects

*Click on any hexagon in the networks for interaction annotation*

| Link legend                                                                       |                    |
|-----------------------------------------------------------------------------------|--------------------|
|  | Positive effect    |
|  | Negative effect    |
|  | Unspecified effect |
|  | Technical link     |

| Mechanisms                                                                          |                                                                                                                                                                                                                                                             |
|-------------------------------------------------------------------------------------|-------------------------------------------------------------------------------------------------------------------------------------------------------------------------------------------------------------------------------------------------------------|
| Physical interactions                                                               |                                                                                                                                                                                                                                                             |
|    | <p><b>Binding</b></p> <p>Protein or compound binds other protein or compound</p>                                                                                                                                                                            |
|    | <p><b>Cleavage</b></p> <p>Cleavage of a protein at a specific site yielding distinctive peptide fragments. Proteolytic cleavage can be carried out by both enzymes and compounds</p>                                                                        |
|    | <p><b>Covalent modifications</b></p> <p>(neddylation/deneddylation, sumoylation/desumoylation, ubiquitination/deubiquitination and etc.) Protein activity regulation by covalent binding of a small chemical group to the aminoacids of an active site.</p> |
|  | <p><b>Phosphorylation</b></p> <p>Protein activity regulation by an addition of a phosphate group</p>                                                                                                                                                        |
|  | <p><b>Dephosphorylation</b></p> <p>Protein activity regulation by a removal of a phosphate group</p>                                                                                                                                                        |
|  | <p><b>Transformation</b></p> <p>Protein activity regulation by binding &amp; hydrolysis of GTP</p>                                                                                                                                                          |
|  | <p><b>Transport</b></p> <p>Transport of a protein or a compound between organelles</p>                                                                                                                                                                      |

|                                                                                     |                                                                                                                                                                                             |
|-------------------------------------------------------------------------------------|---------------------------------------------------------------------------------------------------------------------------------------------------------------------------------------------|
|     | <b>Catalysis</b><br>Catalysis of an enzymatic reaction                                                                                                                                      |
|    | <b>Transcription regulation</b><br>Physical binding of a transcription factor to target gene's promoter                                                                                     |
|    | <b>MicroRNA binding</b><br>Regulation of gene expression by binding of microRNA to target mRNA                                                                                              |
| <b>Functional interactions</b>                                                      |                                                                                                                                                                                             |
|    | <b>Influence on expression</b><br>Protein's or compound's action results in changing the expression level of target gene(s)                                                                 |
|    | <b>Competition</b><br>Protein activity regulation by competition at the substrate binding site                                                                                              |
|    | <b>Unspecified interactions</b><br>Mechanism is unknown or/and effect is indirect                                                                                                           |
|    | <b>Drug-Drug interactions. Pharmacological effect</b><br>Drugs change pharmacological effects of other drugs, for instance by competing for drug metabolism enzymes or organic transporters |
|  | <b>Drug-Drug interactions. Toxic effect</b><br>Drugs change toxic effects of other drugs, for instance by competing for drug metabolism enzymes or organic transporters                     |
| <b>Logical relations</b>                                                            |                                                                                                                                                                                             |
|  | <b>Group relation</b><br>Object belongs to a generic group of related objects                                                                                                               |
|  | <b>Complex subunit</b><br>Protein is a subunit of a protein complex                                                                                                                         |
|  | <b>Similarity relation</b><br>Chemically similar compounds with chosen Tanimoto similarity score                                                                                            |

## Connectors

| Connectors                                                                          |                                                                                                                                  |
|-------------------------------------------------------------------------------------|----------------------------------------------------------------------------------------------------------------------------------|
|    | <p><b>Incoming interaction</b></p> <p>When the mouse is over an object, yellow link indicates direction <b>to</b> the object</p> |
|    | <p><b>Outgoing interaction</b></p> <p>Cyan link indicates direction <b>from</b> the object</p>                                   |
|    | <p><b>Bidirectional interaction</b></p> <p>Blue link indicates <b>BI-DIRECTIONAL</b> interaction</p>                             |
|    | <p><b>Non-directional link</b></p> <p>Blue link also indicates an interaction for which the direction is not specified</p>       |
|    | <p><b>Traced link</b></p> <p>The link is always highlighted in blue if both linked objects are selected in "Trace" mode</p>      |
| Interactions from custom list                                                       |                                                                                                                                  |
|  | <p><b>Interaction is in the network</b></p> <p>Interaction is represented by a thin solid line and is highlighted in blue</p>    |
|  | <p><b>Interaction is in the base, but not in network</b></p> <p>Interaction is highlighted in yellow</p>                         |
|  | <p><b>Interaction is not present in the base</b></p> <p>Interaction is highlighted in magenta</p>                                |
| Canonical pathways                                                                  |                                                                                                                                  |
|  | <p><b>Canonical pathways</b></p> <p>The link is highlighted in thick cyan line</p>                                               |
| Custom marked links (user's choice)                                                 |                                                                                                                                  |

|                                                                                   |                                                                                   |                                                                                   |                                                                                    |                                                                                     |                                                                                     |
|-----------------------------------------------------------------------------------|-----------------------------------------------------------------------------------|-----------------------------------------------------------------------------------|------------------------------------------------------------------------------------|-------------------------------------------------------------------------------------|-------------------------------------------------------------------------------------|
|   |   |   |   |   |   |
|  |  |  |  |  |  |
|  |  |  |  |  |  |
|  |  |  |  |                                                                                     |                                                                                     |
