# Supplementary material
Source: PubMed Central journal article supplement (PMC3445701)

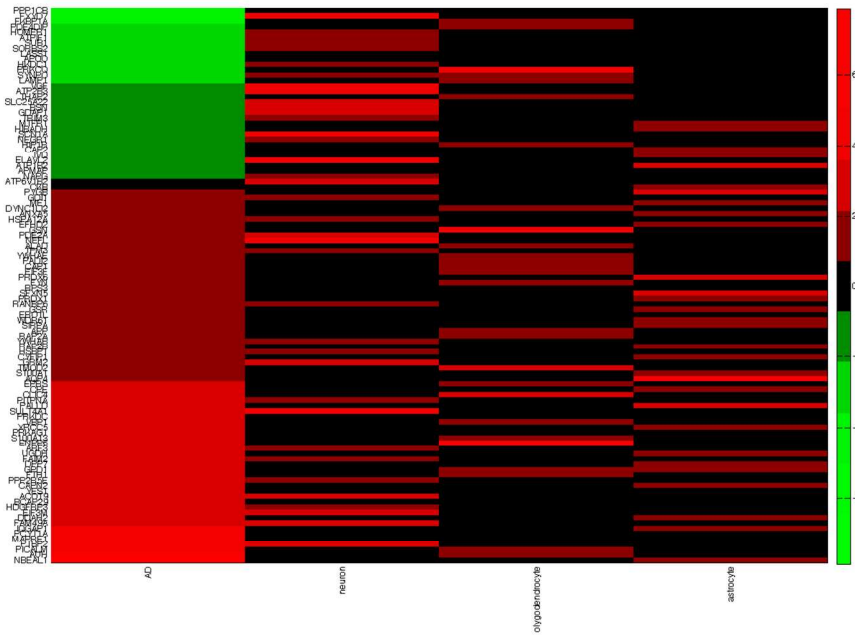

370x252mm (96 x 96 DPI)

Supplement: NIHMS378496-supplement-4_si_004.pdf [file NIHMS378496-supplement-4_si_004.pdf]
